# Supplementary material
Source: PubMed Central journal article supplement (PMC7954049)

Table S1 Univariate analysis of overall survival and progression-free survival in stage III and IV lung cancer

| Overall survival          | HR    | Lower | Upper  | p-value |
|---------------------------|-------|-------|--------|---------|
| Age                       | 0.953 | 0.901 | 1.008  | 0.094   |
| Gender                    | 1.951 | 0.234 | 16.271 | 0.537   |
| BMI                       | 0.968 | 0.843 | 1.112  | 0.643   |
| Smoke, PKY                | 1.005 | 0.99  | 1.021  | 0.503   |
| ECOG status               | 5.197 | 1.217 | 22.186 | 0.026*  |
| AHI                       | 5.211 | 1.082 | 25.092 | 0.040*  |
| ODI                       | 1.013 | 0.989 | 1.037  | 0.289   |
| Lower SpO <sub>2</sub>    | 0.96  | 0.88  | 1.048  | 0.366   |
| TSpO <sub>2</sub> 90%     | 1.038 | 1.007 | 1.07   | 0.016*  |
| Cancer stage              | 1.479 | 0.405 | 5.402  | 0.554   |
| Ischemic heart disease    | 1.03  | 0.22  | 4.74   | 0.968   |
| COPD                      | 0.57  | 0.07  | 4.52   | 0.593   |
| Progression-free survival | HR    | Lower | Upper  | p-value |
| Age                       | 0.97  | 0.92  | 1.02   | 0.267   |
| Gender                    | 4.48  | 0.46  | 43.10  | 0.195   |
| BMI                       | 1.00  | 0.88  | 1.14   | 0.966   |
| Smoke, PKY                | 1.01  | 0.99  | 1.02   | 0.338   |
| ECOG status               | 3.46  | 0.88  | 13.61  | 0.075   |
| AHI                       | 11.19 | 1.37  | 91.55  | 0.024*  |
| ODI                       | 1.01  | 0.99  | 1.03   | 0.301   |
| Lower SpO <sub>2</sub>    | 0.98  | 0.90  | 1.06   | 0.563   |
| TSpO <sub>2</sub> 90%     | 1.03  | 1.01  | 1.06   | 0.020*  |
| Cancer stage              | 2.11  | 0.57  | 7.79   | 0.262   |
| Ischemic heart disease    | 3.10  | 0.73  | 13.17  | 0.125   |
| COPD                      | 0.35  | 0.04  | 2.81   | 0.322   |

Abbreviation: AHI: apnea-hypopnea index, BMI: body mass index, CI: confidence interval, COPD: chronic obstructive pulmonary disease, ECOG: Eastern Cooperative Oncology Group performance status, HR: hazard ratio, ODI: oxygen desaturation index, SpO<sub>2</sub>: oxygen saturation, Tsat90%: the percentage of sleep time with oxygen saturation <90%

Table S2 Multivariate analysis of overall survival and progression-free survival in stage

III and IV lung cancer

| Models (OS)  |             | HR    | 95%CI         | p-value |
|--------------|-------------|-------|---------------|---------|
| 1            | AHI         | 1.84  | 0.25 - 13.75  | 0.552   |
|              | Tsat90%     | 1.07  | 0.98 - 1.17   | 0.127   |
|              | ECOG status | 0.11  | 0.00 - 8.06   | 0.314   |
| 2            | AHI         | 5.59  | 1.06 - 29.51  | 0.043*  |
|              | Age         | 0.95  | 0.90 - 1.01   | 0.099   |
| 3            | AHI         | 6.03  | 1.20 - 30.19  | 0.029*  |
|              | BMI         | 0.93  | 0.80 - 1.08   | 0.329   |
| 4            | AHI         | 6.70  | 0.84 - 53.74  | 0.073   |
|              | ODI         | 0.99  | 0.95 - 1.03   | 0.572   |
| 5            | AHI         | 2.67  | 0.43 - 16.54  | 0.290   |
|              | Tsat90%     | 1.03  | 0.99 - 1.06   | 0.105   |
| Models (PFS) |             | HR    | 95%CI         | p-value |
| 1            | AHI         | 6.58  | 0.69 - 63.03  | 0.102   |
|              | Tsat90%     | 1.02  | 0.99 - 1.05   | 0.212   |
| 2            | AHI         | 10.14 | 1.22 - 84.04  | 0.032*  |
|              | Age         | 0.98  | 0.93 - 1.04   | 0.573   |
| 3            | AHI         | 11.22 | 1.37 - 92.01  | 0.024*  |
|              | BMI         | 1.00  | 0.88 - 1.15   | 0.943   |
| 4            | AHI         | 24.08 | 1.73 - 335.13 | 0.018*  |
|              | ODI         | 0.98  | 0.94 - 1.02   | 0.255   |

Note: multivariate regression models to adjust two confounders at a time

Abbreviation: AHI: apnea-hypopnea index, CI: confidence interval, HR: hazard ratio, ODI: oxygen desaturation index, OS: overall survival, PFS: progression-free survival, Tsat90%: the percentage of sleep time with oxygen saturation <90%

Table S3 Comparisons between the groups with high and low expression of vascular endothelial growth factor (VEGF)

|                         | VEGF high<br>expression<br>(N= 12 ) | VEGF low<br>expression<br>(N = 10) | Odds ratio       | P    |
|-------------------------|-------------------------------------|------------------------------------|------------------|------|
| Age, yrs                | 62.3±14.3                           | 62.2±8.9                           | 1(0.93-1.07)     | 0.98 |
| Gender, male            | 12                                  | 9                                  |                  | 1.00 |
| Polysomnography         |                                     |                                    |                  |      |
| AHI                     | 40.1±22.9                           | 36.9±27.1                          | 0.99(0.96-1.13)  | 0.76 |
| ODI                     | 24.7±17.4                           | 32.9±26.3                          | 1.02(0.97-1.06)  | 0.28 |
| Lowest SpO <sub>2</sub> | 82.3±5.8                            | 82.6±5.2                           | 1.01(0.86-1.19)  | 0.88 |
| Tsat90%                 | 23.8±33.4                           | 5.3±6.5                            | 0.94(0.86-1.04)  | 0.86 |
| Cancer stage            |                                     |                                    |                  |      |
| Stage 1                 | 1(8%)                               | 5(50%)                             | 1.00             |      |
| Stage 2                 | 1(8%)                               | 0(0%)                              |                  |      |
| Stage 3                 | 3(25%)                              | 1(10%)                             | 0.07(0.00-1.51)  | 0.09 |
| Stage 4                 | 7(59%)                              | 4(40%)                             | 0.11(0.01-1.36)  | 0.09 |
| Pathology               |                                     |                                    |                  |      |
| Adenocarcinoma          | 7(58%)                              | 6(60%)                             | 1.00             |      |
| Squamous cell           | 2(16%)                              | 4(40%)                             | 2.33(0.31-17.54) | 0.83 |
| Other                   | 3(26%)                              | 0(0%)                              |                  |      |

Note: Data are presented as mean ± standard deviation, or number (percentage).

Abbreviation: AHI: apnea-hypopnea index, ODI: oxygen desaturation index, SpO<sub>2</sub>: oxygen saturation, Tsat90%: the percentage of sleep time with oxygen saturation <90%

Figure S1: Overall survival (Kaplan-Meier survival analysis) of lung cancer, grouped by the AHI severity (AHI < 15, AHI 15 to 29, and AHI = or > 30)

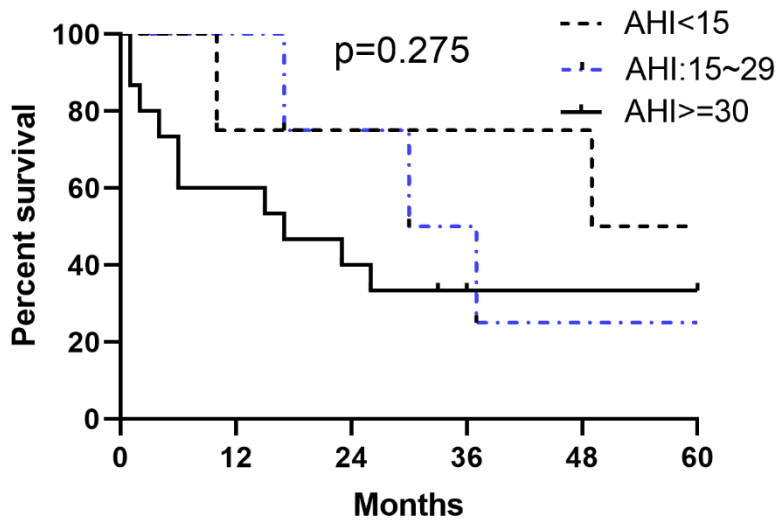

Figure S2: Kaplan-Meier survival analysis in a sleep cohort with lung cancer with hypoxia-inducible factor 1 $\alpha$ (HIF-1 $\alpha$ ) (high vs low expression) (a) overall survival of stage III-IV lung cancer (b) progression-free survival of stage III-IV lung cancer.

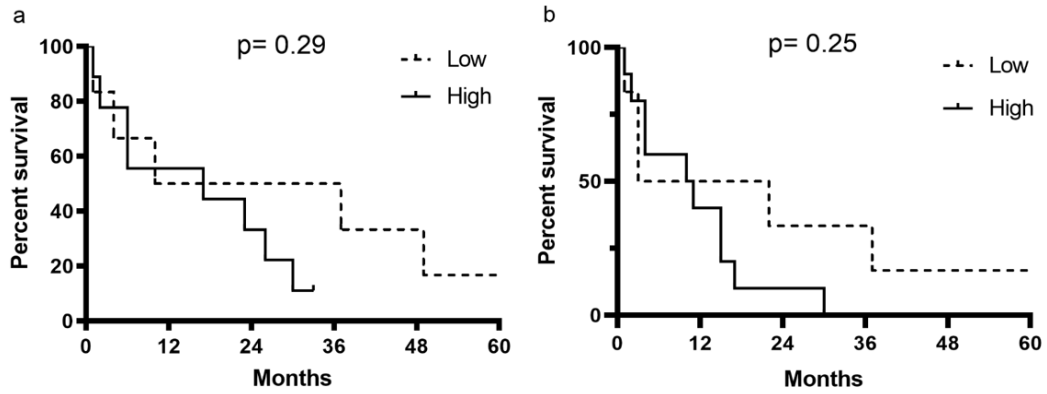

Supplement: jcsm.8432.ds001.pdf [file jcsm.8432.ds001.pdf]
